# Supplementary material for: Mammalian histones facilitate antimicrobial synergy by disrupting the bacterial proton gradient and chromosome organization
Source: PubMed Central journal article supplement (PMC7403156; doi:10.1038/s41467-020-17699-z), 2020-08-04
Supplement: 41467_2020_17699_MOESM1_ESM.pdf [file 41467_2020_17699_MOESM1_ESM.pdf]

**Mammalian histones facilitate antimicrobial synergy by disrupting the bacterial proton gradient and chromosome organization, Doolin et al.**

**Supplementary Information**

Supplementary Table 1  
Supplementary Figures 1-5  
Source Data

## SUPPLEMENTARY TABLE 1

| Gene        | Function                                                                                                                     | 10/0        | 50/0        | 100/0        |
|-------------|------------------------------------------------------------------------------------------------------------------------------|-------------|-------------|--------------|
| <i>wza</i>  | colanic acid export protein; outer membrane auxillary lipoprotein                                                            | 2.9         | 43.3        | 72.8         |
| <i>wzb</i>  | colanic acid production protein-tyrosine-phosphatase; Wzc-P dephosphorylase                                                  | 3.9         | 40.2        | 70.2         |
| <i>wcaE</i> | putative glycosyl transferase                                                                                                | 2.5         | 34.6        | 55.7         |
| <i>wcaG</i> | bifunctional GDP-fucose synthetase: GDP-4-dehydro-6-deoxy-D-mannose epimerase/<br>GDP-4-dehydro-6-L-deoxygalactose reductase | 3.1         | 29.8        | 49.8         |
| <i>bdm</i>  | biofilm-dependent modulation protein                                                                                         | 4.0         | 35.3        | 49.6         |
| <i>yjbE</i> | extracellular polysaccharide production threonine-rich protein                                                               | 2.8         | 29.5        | 47.5         |
| <i>yjbF</i> | extracellular polysaccharide production lipoprotein                                                                          | 2.9         | 25.8        | 44.0         |
| <i>wcaA</i> | putative glycosyl transferase                                                                                                | 2.1         | 23.3        | 39.7         |
| <i>rprA</i> | Null                                                                                                                         | 3.4         | 23.1        | 39.5         |
| <i>wcaD</i> | putative colanic acid polymerase                                                                                             | 2.2         | 23.3        | 37.6         |
| <i>gmd</i>  | GDP-D-mannose dehydratase, NAD(P)-binding                                                                                    | 2.4         | 22.3        | 36.6         |
| <i>wzc</i>  | colanic acid production tyrosine-protein kinase; autokinase; Ugd phosphorylase                                               | 2.1         | 21.6        | 36.3         |
| <i>yjbG</i> | extracellular polysaccharide export OMA protein                                                                              | 2.2         | 20.5        | 34.9         |
| <i>wcaF</i> | putative acyl transferase                                                                                                    | 1.6         | 19.5        | 32.2         |
| <i>ymgI</i> | uncharacterized protein                                                                                                      | 1.0         | 25.1        | 32.0         |
| <i>osmB</i> | osmotically and stress inducible lipoprotein                                                                                 | 4.2         | 24.5        | 30.6         |
| <i>wcaI</i> | putative glycosyl transferase                                                                                                | 2.3         | 18.5        | 30.2         |
| <i>cpsG</i> | phosphomannomutase                                                                                                           | 1.9         | 19.4        | 30.2         |
| <i>wcaH</i> | GDP-mannose mannosyl hydrolase                                                                                               | 1.8         | 16.1        | 26.4         |
| <i>wcaJ</i> | colanic biosynthesis UDP-glucose lipid carrier transferase                                                                   | 2.3         | 16.5        | 25.2         |
| <i>cpsB</i> | mannose-1-phosphate guanyltransferase                                                                                        | 2.1         | 15.2        | 24.7         |
| <i>rcsA</i> | transcriptional regulator of colanic acid capsular biosynthesis                                                              | 1.9         | 14.7        | 21.6         |
| <i>ymgG</i> | UPF0757 family protein                                                                                                       | 2.9         | 17.2        | 21.6         |
| <i>wcaC</i> | putative glycosyl transferase                                                                                                | 1.8         | 12.4        | 20.4         |
| <i>wxC</i>  | putative colanic acid exporter                                                                                               | 2.0         | 12.8        | 18.5         |
| <i>ymgD</i> | periplasmic protein, HdeA structural homolog                                                                                 | 2.5         | 14.8        | 18.2         |
| <i>wcaB</i> | putative acyl transferase                                                                                                    | 1.4         | 9.7         | 16.9         |
| <i>wcaK</i> | colanic acid biosynthesis protein                                                                                            | 1.6         | 11.3        | 14.8         |
| <i>ivy</i>  | inhibitor of c-type lysozyme, periplasmic                                                                                    | 1.8         | 10.6        | 14.7         |
| <i>yjbH</i> | DUF940 family extracellular polysaccharide protein                                                                           | 1.4         | 8.9         | 14.3         |
| <i>ygaC</i> | uncharacterized protein                                                                                                      | 2.1         | 10.1        | 14.1         |
| <i>mliC</i> | inhibitor of c-type lysozyme, membrane-bound; putative lipoprotein                                                           | 1.5         | 7.0         | 10.2         |
| <i>osmY</i> | salt-inducible putative ABC transporter periplasmic binding protein                                                          | 1.6         | 6.6         | 9.4          |
| <i>ugd</i>  | UDP-glucose 6-dehydrogenase                                                                                                  | 1.2         | 6.6         | 8.9          |
| <i>ygdI</i> | DUF903 family verified lipoprotein                                                                                           | 1.6         | 6.0         | 8.2          |
| <i>ypeC</i> | DUF2502 family putative periplasmic protein                                                                                  | 1.5         | 5.3         | 8.2          |
| <i>yjA</i>  | uncharacterized protein                                                                                                      | 1.4         | 5.5         | 8.1          |
| <i>ycfJ</i> | uncharacterized protein                                                                                                      | 1.4         | 5.0         | 7.7          |
| <i>ybgS</i> | putative periplasmic protein                                                                                                 | 1.2         | 5.2         | 7.2          |
| <i>wcaL</i> | putative glycosyl transferase                                                                                                | 1.3         | 5.4         | 7.1          |
| <i>yaiY</i> | DUF2755 family inner membrane protein                                                                                        | 1.4         | 4.8         | 7.0          |
| <i>iraM</i> | RpoS stabilizer during Mg starvation, anti-RssB factor                                                                       | 1.1         | 5.1         | 6.8          |
| <i>ydeI</i> | hydrogen peroxide resistance OB fold protein; putative periplasmic protein                                                   | 0.9         | 5.6         | 6.6          |
| <i>ecpR</i> | putative transcriptional regulator for the ecp operon                                                                        | 1.2         | 4.8         | 6.2          |
| <i>yghA</i> | putative oxidoreductase                                                                                                      | 1.1         | 4.1         | 6.0          |
| <i>ycfT</i> | inner membrane protein                                                                                                       | 1.1         | 3.7         | 5.9          |
| <i>katE</i> | catalase HPII, heme d-containing                                                                                             | 1.2         | 4.2         | 5.8          |
| <i>degP</i> | serine endoprotease (protease Do), membrane-associated                                                                       | 1.2         | 3.6         | 5.3          |
| <i>osmC</i> | lipoyl-dependent Cys-based peroxidase, hydroperoxide resistance; salt-shock inducible<br>membrane protein; peroxiredoxin     | 1.4         | 3.9         | 5.1          |
| <i>yiaD</i> | multicopy suppressor of bamB; outer membrane lipoprotein                                                                     | 1.5         | 4.3         | 5.1          |
| <i>yegS</i> | phosphatidylglycerol kinase, metal-dependent                                                                                 | 1.2         | 4.0         | 5.0          |
| <i>sra</i>  | stationary-phase-induced ribosome-associated protein                                                                         | 1.3         | 3.9         | 5.0          |
| <i>ecpB</i> | ECP production pilus chaperone                                                                                               | 1.2         | 2.9         | 4.8          |
| <i>ypfG</i> | DUF1176 family protein                                                                                                       | 1.2         | 3.4         | 4.7          |
| <i>yohP</i> | uncharacterized protein                                                                                                      | 2.0         | 3.1         | 4.7          |
| <i>yiaB</i> | YiaAB family inner membrane protein                                                                                          | 0.7         | 3.1         | 4.6          |
| <b>Gene</b> | <b>Function</b>                                                                                                              | <b>10/0</b> | <b>50/0</b> | <b>100/0</b> |
| <i>hslJ</i> | heat-inducible lipoprotein involved in novobiocin resistance                                                                 | 1.3         | 3.9         | 4.6          |
| <i>ecpA</i> | ECP pilin                                                                                                                    | 1.1         | 3.3         | 4.6          |
| <i>yjdP</i> | putative periplasmic protein                                                                                                 | 1.3         | 3.5         | 4.5          |
| <i>bax</i>  | putative glucosaminidase                                                                                                     | 1.5         | 3.9         | 4.5          |

|              |                                                                                                         |     |     |     |
|--------------|---------------------------------------------------------------------------------------------------------|-----|-----|-----|
| <i>yajI</i>  | putative lipoprotein                                                                                    | 1.4 | 3.2 | 4.4 |
| <i>loiP</i>  | Phe-Phe periplasmic metalloprotease, OM lipoprotein; low salt-inducible; Era-binding heat shock protein | 1.2 | 3.3 | 4.3 |
| <i>spy</i>   | periplasmic ATP-independent protein refolding chaperone, stress-induced                                 | 0.8 | 2.7 | 4.3 |
| <i>osmE</i>  | osmotically-inducible lipoprotein                                                                       | 1.4 | 3.3 | 4.2 |
| <i>yjbT</i>  | putative periplasmic protein                                                                            | 1.3 | 3.0 | 4.1 |
| <i>ybjP</i>  | lipoprotein                                                                                             | 1.2 | 3.4 | 4.0 |
| <i>ytfK</i>  | DUF1107 family protein                                                                                  | 1.1 | 2.8 | 3.9 |
| <i>ysaB</i>  | uncharacterized protein                                                                                 | 1.3 | 3.6 | 3.9 |
| <i>galP</i>  | D-galactose transporter                                                                                 | 1.2 | 3.0 | 3.8 |
| <i>rcnB</i>  | periplasmic modulator of Ni and Co efflux                                                               | 1.3 | 3.4 | 3.7 |
| <i>ybaY</i>  | outer membrane lipoprotein                                                                              | 1.1 | 2.7 | 3.7 |
| <i>omrB</i>  | Null                                                                                                    | 1.1 | 2.4 | 3.7 |
| <i>omrA</i>  | Null                                                                                                    | 1.0 | 2.5 | 3.6 |
| <i>eco</i>   | ecotin, a serine protease inhibitor                                                                     | 1.2 | 2.8 | 3.5 |
| <i>stpA</i>  | DNA binding protein, nucleoid-associated                                                                | 1.6 | 3.8 | 3.4 |
| <i>wcaM</i>  | colanic acid biosynthesis protein                                                                       | 1.2 | 3.1 | 3.4 |
| <i>ygdR</i>  | DUF903 family verified lipoprotein                                                                      | 1.1 | 2.7 | 3.3 |
| <i>ydeT'</i> | pseudogene                                                                                              | 0.8 | 3.0 | 3.3 |
| <i>ygaM</i>  | putative membrane-anchored DUF883 family ribosome-binding protein                                       | 1.1 | 2.2 | 3.3 |
| <i>glsA</i>  | glutaminase 1                                                                                           | 1.5 | 2.0 | 3.2 |
| <i>yhbO</i>  | stress-resistance protein                                                                               | 1.0 | 2.3 | 3.2 |
| <i>yggE</i>  | oxidative stress defense protein                                                                        | 1.2 | 2.6 | 3.1 |
| <i>ybiH</i>  | DUF1956 domain-containing tetR family putative transcriptional regulator                                | 1.3 | 2.0 | 3.1 |
| <i>yodB</i>  | cytochrome b561 homolog                                                                                 | 1.2 | 2.6 | 3.1 |
| <i>ygiM</i>  | SH3 domain protein                                                                                      | 1.1 | 2.4 | 3.0 |
| <i>ydeQ</i>  | putative fimbrial-like adhesin protein                                                                  | 1.3 | 2.1 | 3.0 |
| <i>ybhG</i>  | putative membrane fusion protein (MFP) component of efflux pump, membrane anchor                        | 1.4 | 1.8 | 3.0 |
| <i>otsB</i>  | trehalose-6-phosphate phosphatase, biosynthetic                                                         | 1.3 | 2.2 | 2.9 |
| <i>yjbJ</i>  | stress-induced protein, UPF0337 family                                                                  | 1.4 | 2.4 | 2.9 |
| <i>ybfA</i>  | DUF2517 family protein                                                                                  | 1.2 | 1.5 | 2.9 |
| <i>ybdG</i>  | mechanosensitive channel protein, miniconductance                                                       | 1.2 | 2.3 | 2.9 |
| <i>yehX</i>  | putative ABC transporter ATPase                                                                         | 1.4 | 1.7 | 2.8 |
| <i>fepA</i>  | ferrienterobactin outer membrane transporter                                                            | 1.0 | 2.2 | 2.8 |
| <i>gmr</i>   | cyclic-di-GMP phosphodiesterase; csgD regulator; modulator of RNase II stability                        | 1.0 | 2.2 | 2.8 |
| <i>ybdZ</i>  | stimulator of EntF adenylation activity, MbtH-like                                                      | 1.0 | 2.2 | 2.7 |
| <i>entE</i>  | 2,3-dihydroxybenzoate-AMP ligase component of enterobactin synthase multienzyme complex                 | 1.0 | 2.0 | 2.7 |
| <i>yfeY</i>  | RpoE-regulated lipoprotein                                                                              | 1.1 | 2.0 | 2.7 |
| <i>yceB</i>  | lipoprotein, DUF1439 family                                                                             | 1.1 | 2.2 | 2.7 |
| <i>ydeS</i>  | putative fimbrial-like adhesin protein                                                                  | 1.2 | 1.8 | 2.6 |
| <i>caiD</i>  | carnitiny-CoA dehydratase                                                                               | 1.4 | 2.3 | 2.6 |

**Supplemental Table 1.** Fold-change in mRNA transcript in the top 100 genes up-regulated in *E. coli* following a 30-minute treatment with H2A. The 10/0, 50/0, and 100/0 labels indicate comparison between 10, 50, or 100  $\mu\text{g/mL}$  H2A and untreated cells. Values are the average of three independent experiments.

# SUPPLEMENTARY FIGURES

## Supplementary Figure 1

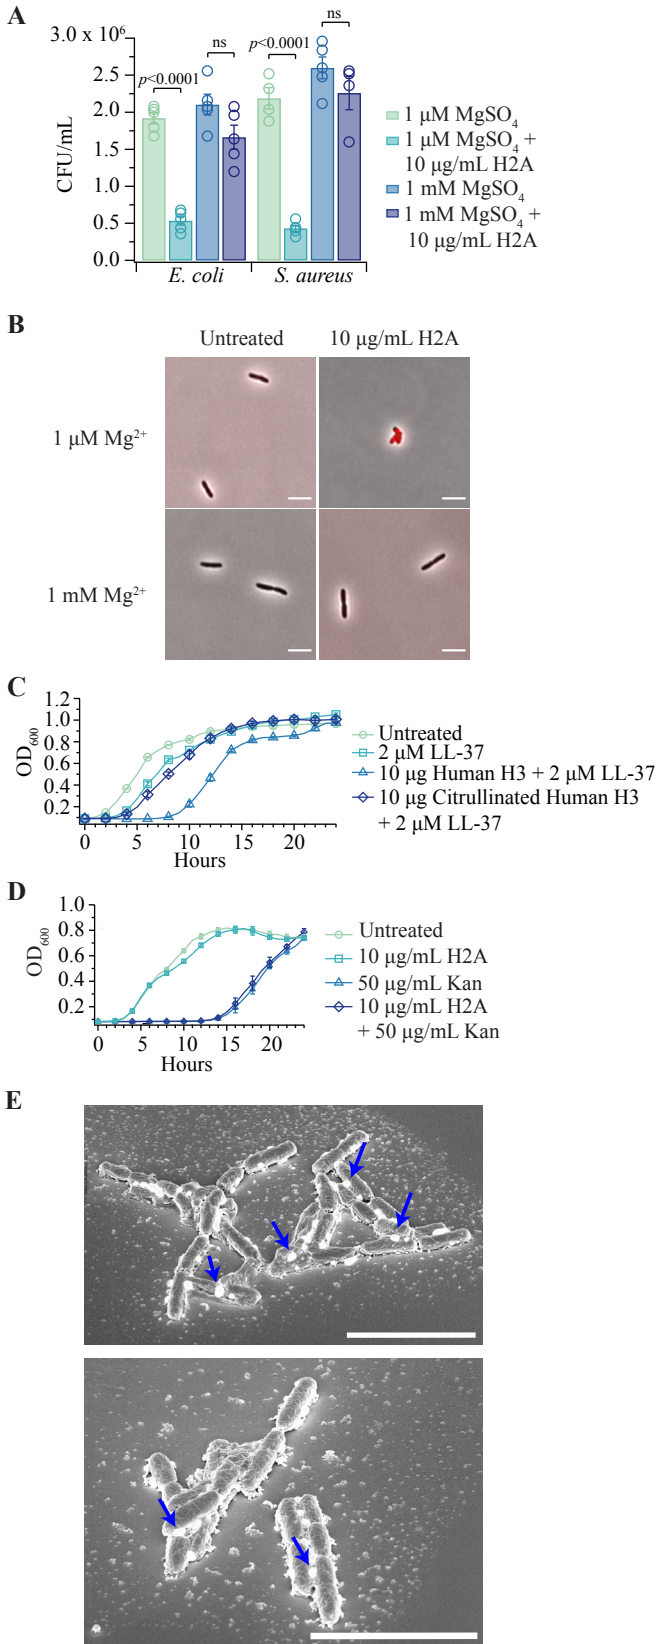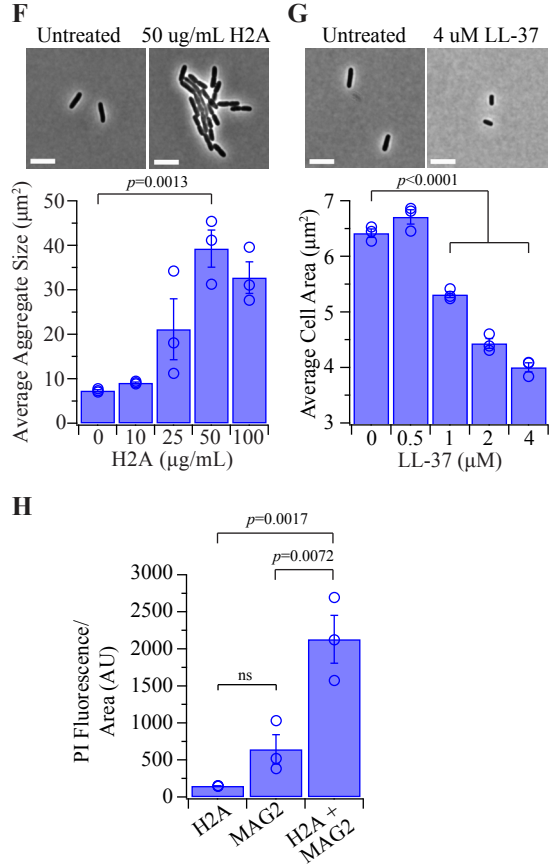

**Figure 1. Histone H2A kills *E. coli* and *S. aureus* in low ionic environments and synergizes with AMPs in physiological environments. H2A induces cell aggregates whereas LL-37 reduces cell size.** (A) Colony forming unit (CFU) counts of *E. coli* and *S. aureus* treated with H2A in media containing low (1  $\mu\text{M}$ ) and physiological (1 mM) magnesium ( $n=5$  for each condition). Bacteria were treated for 1 hour before addition to non-selective LB agar plates. (B) Intracellular propidium iodide (PI) fluorescence images of untreated and H2A-treated *E. coli* in 1  $\mu\text{M}$  and 1 mM concentrations of magnesium after 1-hour treatment. Fluorescence images are overlaid on phase contrast images. (C) Growth profiles of *E. coli* treated with the indicated concentrations of LL-37 alone, LL-37 and human H3, or LL-37 and citrullinated human H3 in minimal medium containing 1 mM magnesium ( $n=4$  for each condition). (D) Growth profiles of *E. coli* treated with 10  $\mu\text{g/mL}$  H2A, 50  $\mu\text{g/mL}$  kanamycin (Kan), or both in minimal medium containing 1 mM magnesium ( $n=6$  for each condition). (E) Scanning electron microscopy (SEM) images of *E. coli* treated with 10  $\mu\text{g/mL}$  H2A and 1  $\mu\text{M}$  LL-37 in minimal medium containing 1 mM magnesium. Blue arrows indicate some of the membrane blebs. (F) Representative phase contrast images and corresponding cell aggregate sizes of *E. coli* that were untreated or treated with 50  $\mu\text{g/mL}$  H2A. *E. coli* were treated with the indicated concentrations of H2A for 1 hour ( $n=3$  for each condition). (G) Representative phase contrast images and corresponding cell sizes of *E. coli* that were untreated or treated with the indicated concentrations of LL-37 for 1 hour ( $n=3$  for each condition). (H) Intracellular propidium iodide (PI) fluorescence intensities of *E. coli* treated with 10  $\mu\text{g/mL}$  H2A, 10  $\mu\text{M}$  magainin-2 (MAG2), or both in minimal medium containing 1 mM magnesium ( $n=3$  for each condition). Points and bars are the average of biologically independent experiments. Error bars indicate standard error of the mean (SEM). One-way ANOVAs were performed. No adjustments were made for multiple comparisons. ns > 0.05. Images are representative of three independent experiments. Scale bars in (B), (E), (F) and (G) represent 5, 5, 3, and 3  $\mu\text{m}$ , respectively.

## Supplementary Figure 2

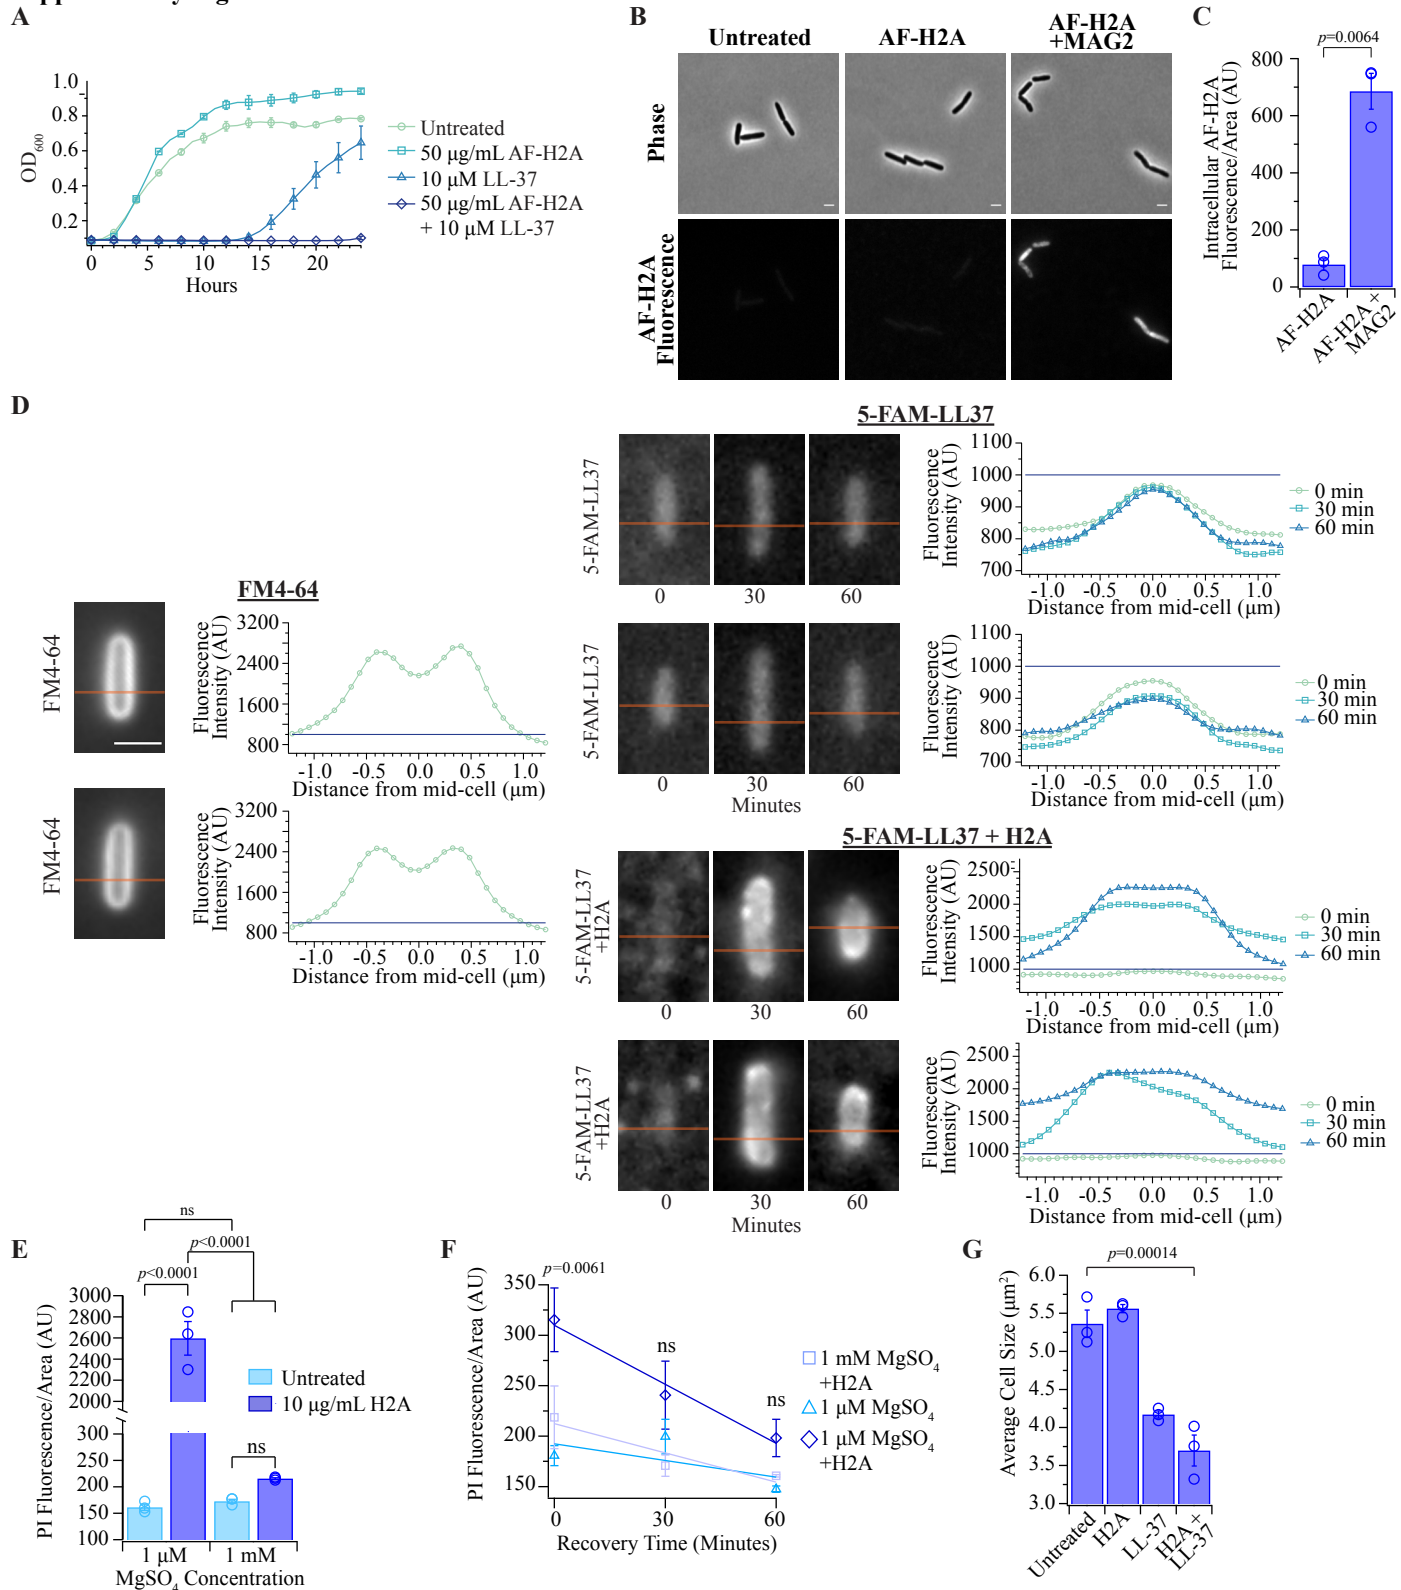

**Figure 2. Effects of H2A in combination with MAG2, recovery from H2A treatment, and the impact of H2A and AMP synergy on cell size.** (A) Growth profiles of *E. coli* that were treated with 50 µg/mL fluorescently-labeled H2A (AF-H2A), 10 µM LL-37, or both, in minimal medium containing 1 mM magnesium (n=4 for each condition). (B) Phase contrast, fluorescence images, and (C) intracellular AF-H2A fluorescence intensities of *E. coli* that were untreated or treated with 10 µg/mL AF-H2A alone or in combination with 10 µM MAG2 (n=3 for each condition). AF-H2A is mixed at a concentration of 1% with unlabeled H2A to decrease fluorescence intensity. (D) Representative images and associated fluorescence intensity profiles of *E. coli* that were treated with 1% 5-FAM-LC-LL-37 alone or in combination with 10 µg/mL H2A for 0, 30, or 60 minutes. The profiles are taken along the lines indicated in orange. Cell membranes were visualized using FM4-64. (E) Intracellular propidium iodide (PI) fluorescence intensities of H2A-treated *E. coli* in low (1 µM) and physiological (1 mM) magnesium after a 3-hour treatment (n=3 for each condition). (F) Intracellular propidium iodide (PI) fluorescence of *E. coli* over a 1-hour recovery following a 3-hour treatment with 10 µg/mL H2A in minimal medium containing low or physiological magnesium (n=3 for each condition). (G) *E. coli* cell size following 1-hour treatment with 10 µg/mL H2A, 2 µM LL-37, or the combination of H2A and LL-37 in minimal medium containing 1 mM magnesium (n=3 for each condition). Points and bars are the average of biologically independent experiments. Error bars indicate SEM. A one-tailed t-test for C, two-way ANOVAs for E-F, and a one-way ANOVA for G were performed. No adjustments were made for multiple comparisons. ns > 0.05. Images are representative of three independent experiments. Scale bars in represent 2 µm.

### Supplementary Figure 3

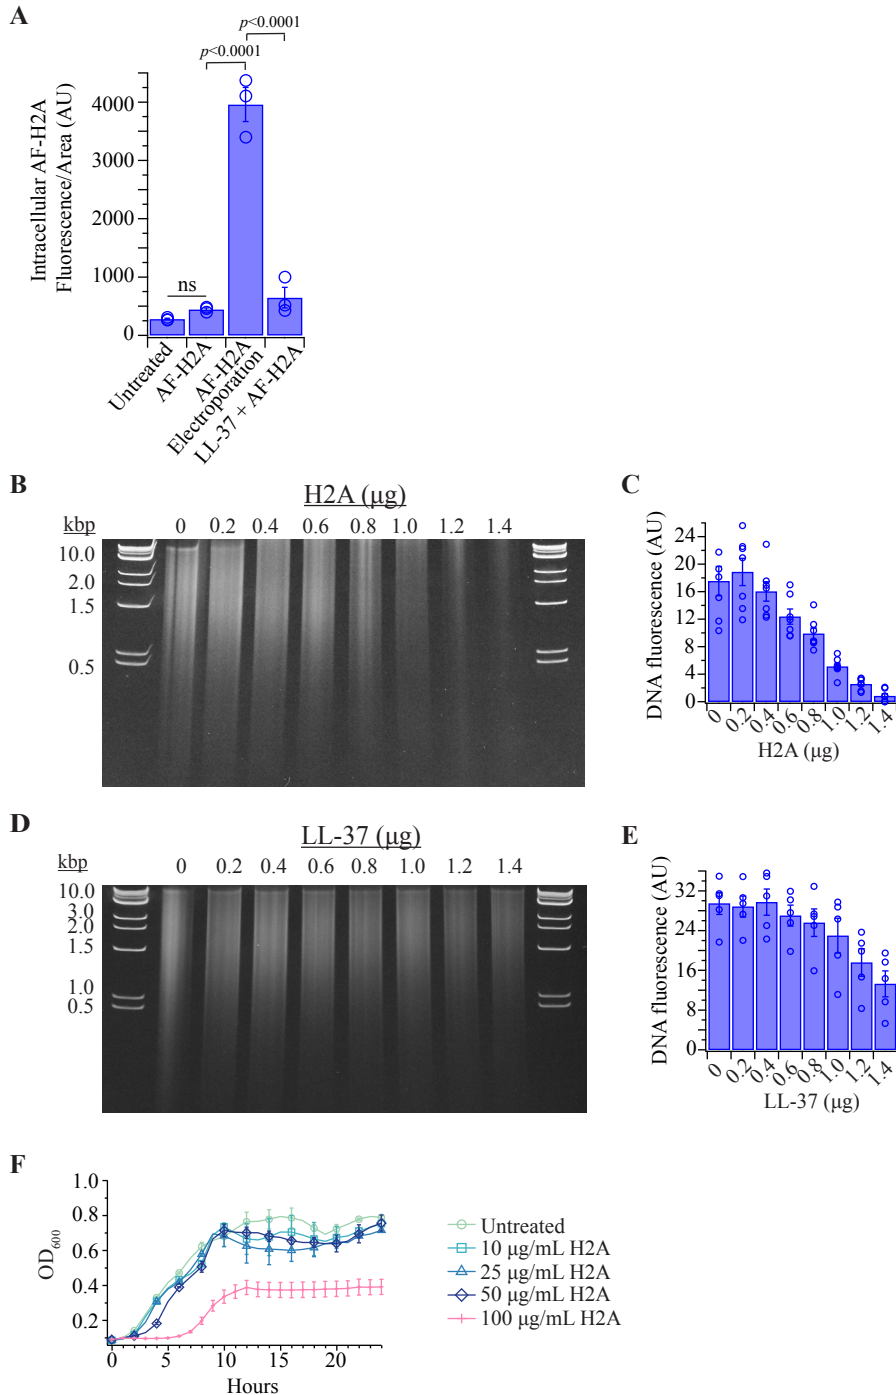

**Figure 3. Electroporation facilitates H2A entry into the cytoplasm, H2A inhibits *E. coli* DNA migration, LL-37 has weak interactions with *E. coli* DNA and high concentrations of H2A inhibit *E. coli* growth.** (A) AF-H2A fluorescence intensities of *E. coli* that were cultured in the absence of AF-H2A (control), electroporated with 10 μg/mL AF-H2A and cultured in minimal medium containing 1 mM magnesium with the same concentration of AF-H2A, or cultured with 2 μM LL-37 and 10 μg/mL AF-H2A (n=3 for each condition). AF-H2A is mixed with unlabeled H2A (1% AF-H2A, combined concentration of 10 μg/mL). Non-denaturing polyacrylamide gel electrophoresis of 1 μg of *E. coli* DNA mixed with indicated concentrations of (B) H2A or (D) LL-37. Corresponding DNA fluorescence intensities for gels with (C) H2A (n=7) or (E) LL-37 (n=5). (F) Growth profiles of *E. coli* treated with 0, 10, 25, 50, and 100 μg/mL H2A in minimal medium containing 1 mM magnesium (n=4 for each condition). Bars and points are shown as mean ± SEM and are representative of independent experiments. ns > 0.05. A one-way ANOVA was performed for A. No adjustments were made for multiple comparisons. For B-E, DNA was obtained from the same biological sample and gels were processed in parallel.

## Supplementary Figure 4

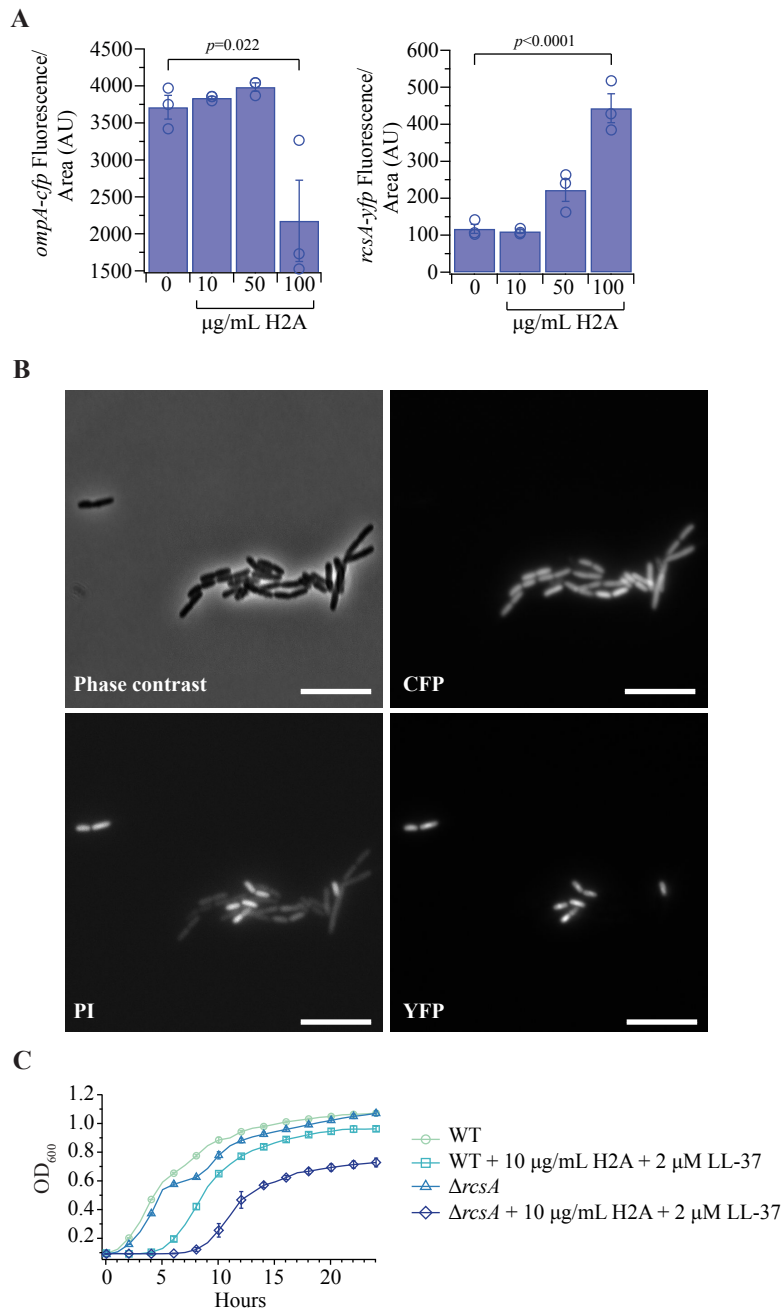

**Figure 4. The Rcs phosphorelay pathway is upregulated by histones and improves *E. coli* survival under dual treatment with H2A and LL-37.** (A) Intracellular *ompA-cfp* and *rcsA-yfp* fluorescence intensities of *E. coli* after a 1-hour treatment with 0, 10, 50, and 100  $\mu\text{g}/\text{mL}$  H2A in medium containing 1 mM magnesium ( $n=3$  for each condition). (B) Phase contrast images and CFP, propidium iodide (PI), and YFP fluorescence images of *E. coli* after a 1-hour treatment with 100  $\mu\text{g}/\text{mL}$  H2A ( $n=3$  for each condition). (C) Growth profiles of wild-type *E. coli* and a *rcsA* mutant *E. coli* strain treated with the 10  $\mu\text{g}/\text{mL}$  H2A and 2  $\mu\text{M}$  LL-37 ( $n=4$  for each condition). Points and bars are the average of biologically independent experiments. Error bars indicate standard error of the mean (SEM). One-way ANOVAs were performed for A. No adjustments were made for multiple comparisons. Scale bars represent 10  $\mu\text{m}$ .

## Supplementary Figure 5

A

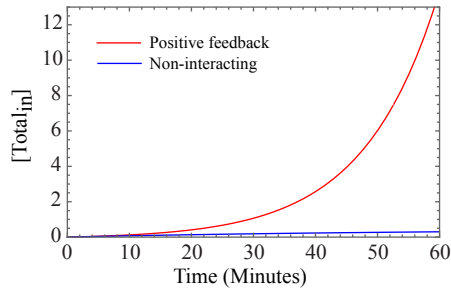

B

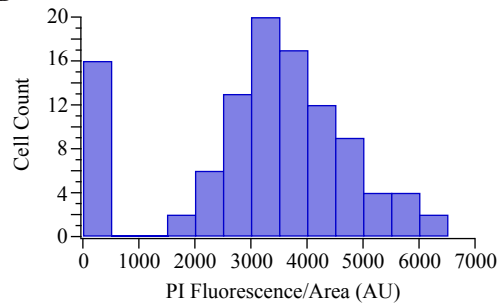

**Figure 5. A positive feedback loop underlies histone-AMP synergy.** (A) Total intracellular concentration of H2A and AMPs as a function of time for positive feedback (red) and non-interacting (blue) relationships. Positive feedback between H2A and AMPs results in the exponential uptake of H2A and AMPs (red). Removal of the feedback loop results in the uptake at a significantly lower rate (blue). Details of the model and simulation are described in the Supplemental Methods section. (B) Histogram of PI fluorescence intensities in *E. coli* following a 1-hour treatment with 10  $\mu\text{g}/\text{mL}$  H2A and 1  $\mu\text{M}$  LL-37 indicates a bimodal distribution of uptake phenotypes.
